# Supplementary material for: Reduced Tumorigenicity of Mouse ES Cells and the Augmented Anti-Tumor Therapeutic Effects under Parg Deficiency
Source: MDPI journal article supplement (doi:10.3390/cancers12041056), 2020-04-24
Supplement: s1 [file s1]

Article

# Reduced Tumorigenicity of Mouse ES Cells and the Augmented Anti-Tumor Therapeutic Effects under *Parg* Deficiency

Yuki Sonoda, Yuka Sasaki, Akemi Gunji, Hidenori Shirai, Tomonori Araki, Shoji Imamichi, Takae Onodera, Anna-Margareta Rydén, Masatoshi Watanabe, Jun Itami, Takuya Honda, Kazuto Ashizawa, Kazuhiko Nakao, Mitsuko Masutani

## Supplementary Materials

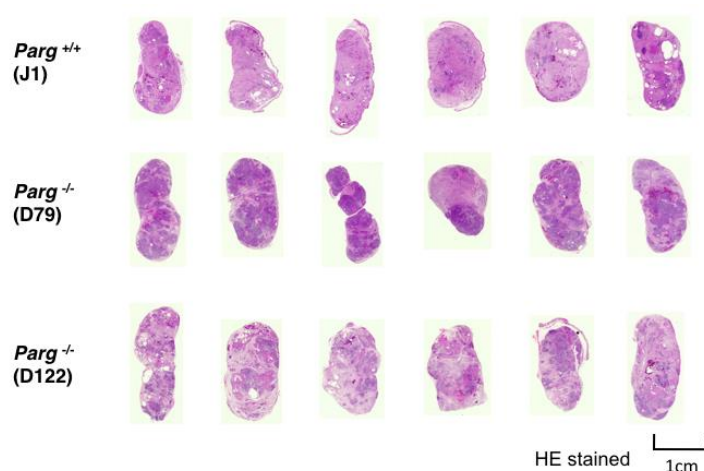

**Figure S1.** Hematoxylin-eosin staining of tumor tissues derived from mouse ES cells 4 weeks after injection.

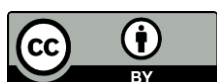

© 2020 by the authors. Licensee MDPI, Basel, Switzerland. This article is an open access article distributed under the terms and conditions of the Creative Commons Attribution (CC BY) license (<http://creativecommons.org/licenses/by/4.0/>).
